# Supplementary material
Source: Springer Nature journal article supplement (https://www.springermedizin.de/resource/supplementary/12888_2010_820_MOESM3_ESM.doc/9478868)
Supplement: MOESM3 [file 9478868]

**TABLE 2: The Latency Difference Of Auditory and Visual Event-Related Potentials With and Without Counting Groups Between Control and Schizophrenic Patients+**

|  | *Auditory With Counting* | | | *Auditory Without Counting* | | | *Visual With Counting* | | | *Visual Without Counting* | | |
| --- | --- | --- | --- | --- | --- | --- | --- | --- | --- | --- | --- | --- |
|  | Control  (n=40) | Schizophrenia  (n=43) | P | Control  (n=40) | Schizophrenia  (n=43) | P | Control  (n=40) | Schizophrenia  (n=43) | P | Control  (n=40) | Schizophrenia  (n=43) | P |
| N100 |  |  |  |  |  |  |  |  |  |  |  |  |
| Frontal | 92.70  (14.67) | 96.88  (14.92) | NS | 98.65  (18.61) | 98.28  (12.15) | NS | 141.35 (19.14) | 143.77  (20.03) | NS | 140.15 (17.76) | 139.81 (21.30) | NS |
| Central | 92.80  (14.69) | 96.98  (14.91) | NS | 98.65  (18.61) | 97.91  (12.23) | NS | 141.35 (19.14) | 143.67  (20.16) | NS | 140.15 (17.76) | 139.81 (21.23) | NS |
| Parietal | 92.55  (14.89) | 97.40  (15.10) | NS | 98.70  (18.57) | 97.58  (12.74) | NS | 141.35 (19.14) | 143.26  (20.83) | NS | 140.15 (17.76) | 139.77 (20.02) | NS |
| N200 |  |  |  |  |  |  |  |  |  |  |  |  |
| Frontal | 235.70  (38.53) | 263.81  (29.21) | <.000 | 234.60 (30.81) | 280.28 (30.60) | <.000 | 285.90 (31.07) | 292.09  (33.12) | NS | 285.55 (37.72 ) | 293.58 (39.99) | NS |
| Central | 234.45 (39.24) | 263.77  (29.72) | <.000 | 233.75 (31.36) | 279.81 (30.99) | <.000 | 285.50 (30.59) | 292.09  (33.12) | NS | 285.55 (37.72) | 293.58 (39.99) | NS |
| Parietal | 235.00 (40.59) | 264.65  (29.15) | <.000 | 232.95 (32.17) | 279.77 (31.02) | <.000 | 285.50 (30.59) | 292.70  (32.76) | NS | 285.55 (37.72) | 293.58 (39.99) | NS |
| P200 |  |  |  |  |  |  |  |  |  |  |  |  |
| Frontal | 186.50 (35.02) | 174.98 (22.06) | NS | 178.65 (27.03) | 174.23 (20.69) | NS | 220.15 (22.79) | 220.51  (27.86) | NS | 220.55 (18.27) | 217.44 (26.11) | NS |
| Central | 185.85 (34.62) | 174.60 (21.52) | NS | 178.85 (26.63) | 172.65 (20.12) | NS | 219.30 (21.88) | 219.72  (25.21) | NS | 219.75 (18.79) | 217.58 (26.00) | NS |
| Parietal | 185.75 (34.51) | 174.23 (21.74) | NS | 178.00 (26.41) | 173.72 (18.61) | NS | 219.15 (21.90) | 220.65  (24.80) | NS | 218.95 (18.53) | 217.63 (25.98) | NS |
| P300 |  |  |  |  |  |  |  |  |  |  |  |  |
| Frontal | 329.75 (26.09) | 344.05 (33.44) | <.05 | 320.85 (23.46) | 341.72 (31.15) | <.005 | 338.95 (32.68) | 351.40  (32.83) | NS | 337.40 (33.21) | 353.44 (31.17) | <.05 |
| Central | 329.60 (25.62) | 343.53 (33.96) | <.05 | 322.20 (26.01) | 339.86 (30.99) | <.005 | 338.95 (32.68) | 351.95  (33.30) | NS | 337.40 (33.21) | 353.53 (31.24) | <.05 |
| Parietal | 330.50 (25.68) | 343.49 (34.62) | NS | 321.30 (25.70) | 338.84 (32.27) | <.005 | 338.95 (32.68) | 352.00  (33.14) | NS | 337.40 (33.21) | 354.14 (32.16) | <.05 |
| P400 |  |  |  |  |  |  |  |  |  |  |  |  |
| Frontal |  |  |  |  |  |  | 435.95 (33.29) | 448.70  (29.65) | NS | 435.60 (25.14) | 437.49 (23.62) | NS |
| Central |  |  |  |  |  |  | 435.70 (33.46) | 448.40  (29.83) | NS | 436.20 (24.64) | 437.58 (22.66) | NS |
| Parietal |  |  |  |  |  |  | 435.20 (34.23) | 448.47 (30.28) | NS | 436.28 (24.71) | 436.74 (23.61) | NS |

+Data are expressed as mean (SD). NS indicates not significant.
